# Supplementary material
Source: publisher figshare collection journal article supplement (https://tandf.figshare.com/ndownloader/files/15158195)
Supplement: Supplementary file 1 [file 15158195]

**Supplementary file for the article titled “Techno-economic and environmental approaches of Cd2+ adsorption by olive leaves (*Olea europaea* L.) waste”**

The adsorption performances were determined by equations Eq. S1 and Eq. S2.

(S1)

(S2)

where, *q*t is adsorption capacity (mg/g) at time = *t* (min), *R* is Cd2+ removal efficiency (%), *m* is biosorbent mass (g), *V* is solution volume (L), and *C*o, *C*e, and *C*t are Cd2+ concentrations at beginning, equilibrium, and *t*, respectively (mg/L).

Table. S1. Comparison of Cd2+ maximum adsorption capacity with those reported in the literature using various adsorbents.

| Adsorbent | *Q*m (mg/g) | *C*o (mg/L) | Reference |
| --- | --- | --- | --- |
| Fe0-nanoparticles | 769.2 | 25 – 450 | Boparai et al. (2011) |
| Mesoporous trapper | 526.3 | 10 | Soliman et al. (2017) |
| Pig manure biochar | 240.23 | 2 – 300 | Wang et al. (2018) |
| Bottlebrush seeds | 111.11 | 50 – 80 | Rao and Kashifuddin (2014) |
| Poultry manure derived biochar | 90.09 | 2 – 50 | Idrees et al. (2016) |
| Mango peel waste | 68.92 | 10 – 600 | Iqbal et al. (2009) |
| Magnetic graphene oxide | 45.05 | 5 – 300 | Huang et al. (2018) |
| Magnetic baker's yeast | 41.00 | 20 – 300 | Zhang et al. (2011) |
| Olive leaves waste | 32.57 | 25 – 400 | This study |
| Earthworm manure-derived carbon | 32.47 | 50 – 500 | Wang et al. (2017) |
| *Plesiomonas shigelloides* modified by carbon | 11.47 | 100 | Xue et al. (2018) |
| Clinoptilolite | 4.22 | 80 | Sprynskyy et al. (2006) |

**References**

Boparai H, Joseph M, O’Carroll D. 2011. Kinetics and thermodynamics of cadmium ion removal by adsorption onto nano zerovalent iron particles. J Hazard Mater. 186(1):458–465. doi: 10.1016/j.jhazmat.2010.11.029.

Huang Q, Chen Y, Yu H, Yan L, Zhang J, Wang B, Du B, Xing L. 2018. Magnetic graphene oxide/MgAl-layered double hydroxide nanocomposite: One-pot solvothermal synthesis, adsorption performance and mechanisms for Pb2+, Cd2+, and Cu2+. Chem Eng J. 341:1–9. doi: 10.1016/j.cej.2018.01.156.

Idrees M, Batool S, Hussain Q, Ullah H, Al-Wabel M, Ahmad M, Kong J. 2016. High-efficiency remediation of cadmium (Cd2+) from aqueous solution using poultry manure– and farmyard manure–derived biochars. Sep Sci Technol. 51(14):2307–2317. doi: 10.1080/01496395.2016.1205093.

Iqbal M, Saeed A, Zafar S. 2009. FTIR spectrophotometry, kinetics and adsorption isotherms modeling, ion exchange, and EDX analysis for understanding the mechanism of Cd(2+) and Pb(2+) removal by mango peel waste. J Hazard Mater. 164(1):161–171. doi: 10.1016/j.jhazmat.2008.07.141.

Rao R, Kashifuddin M. 2014. Kinetics and isotherm studies of Cd(II) adsorption from aqueous solution utilizing seeds of bottlebrush plant (Callistemon chisholmii). Appl Water Sci. 4(4):371–383. doi: 10.1007/s13201-014-0153-2.

Soliman A, Shenashen M, El‐Sewify I, Taha G, El‐Taher M, Yamaguchi H, Alamoudi A, Selim M, El‐Safty S. 2017. Mesoporous Organic-Inorganic Core-Shell Necklace Cages for Potentially Capturing Cd2+ Ions from Water Sources. ChemistrySelect. 2(21):6135–6142. doi: 10.1002/slct.201701247.

Sprynskyy M, Buszewski B, Terzyk A, Namieśnik J. 2006. Study of the selection mechanism of heavy metal (Pb2+, Cu2+, Ni2+, and Cd2+) adsorption on clinoptilolite. J Colloid Interface Sci. 304(1):21–28. doi: 10.1016/j.jcis.2006.07.068.

Wang R-Z, Huang D-L, Liu Y-G, Zhang C, Lai C, Zeng G-M, Cheng M, Gong X-M, Wan J, Luo H. 2018. Investigating the adsorption behavior and the relative distribution of Cd2+ sorption mechanisms on biochars by different feedstock. Bioresour Technol. 261:265–271. doi: 10.1016/j.biortech.2018.04.032.

Wang Z, Shen D, Shen F, Wu C, Gu S. 2017. Equilibrium, kinetics and thermodynamics of cadmium ions (Cd2+) removal from aqueous solution using earthworm manure-derived carbon materials. J Mol Liq. 241:612–621. doi: 10.1016/j.molliq.2017.05.097.

Xue C, Qi P, Liu Y. 2018. Adsorption of aquatic Cd2+ using a combination of bacteria and modified carbon fiber. Adsorpt Sci Technol. 36(3–4):857–871. doi: 10.1177/0263617417724946.

Zhang Y, Zhu J, Zhang L, Zhang Z, Xu M, Zhao M. 2011. Synthesis of EDTAD-modified magnetic baker's yeast biomass for Pb2+ and Cd2+ adsorption. Desalination. 278(1–3):42–49. doi: 10.1016/j.desal.2011.05.003.
